# Supplementary material for: Glucocorticoids induce senescence in primary human tenocytes by inhibition of sirtuin 1 and activation of the p53/p21 pathway: in vivo and in vitro evidence
Source: PubMed Central journal article supplement — Ann Rheum Dis. 2013 Jun 1;73(7):1405–13. doi: 10.1136/annrheumdis-2012-203146 (PMC4078757; doi:10.1136/annrheumdis-2012-203146), 2013-06-01

## Supplementary Figure 1

### Validation of RNAi and adenoviral-mediated gene transduction protocols.

There was no significant difference in **A** viable cell number (determined using the Alamar Blue assay; Life Technologies, Paisley, UK), **B** cell proliferation (measured by BrdU incorporation) or **C** apoptosis (determined by measuring caspase 3/7 activity using the Apo-One Homogeneous Caspase 3/7 Assay, Promega Corporation, Madison, WI, USA) between non-transfected and transfected (siCntrl) ethanol- or dexamethasone- (1 $\mu$ M) treated cells. Similarly, there was no significant difference in the cell response to ethanol or dexamethasone treatment in terms of **D** viable cell number, **E** cell proliferation or **F** apoptosis between cells infected with a GFP-bearing adenoviral construct (adGFP) and uninfected cells. Hydrogen peroxide was used as a positive control for apoptosis induction. Experiments were repeated three times using tenocytes isolated from a different patient for each experimental replicate.

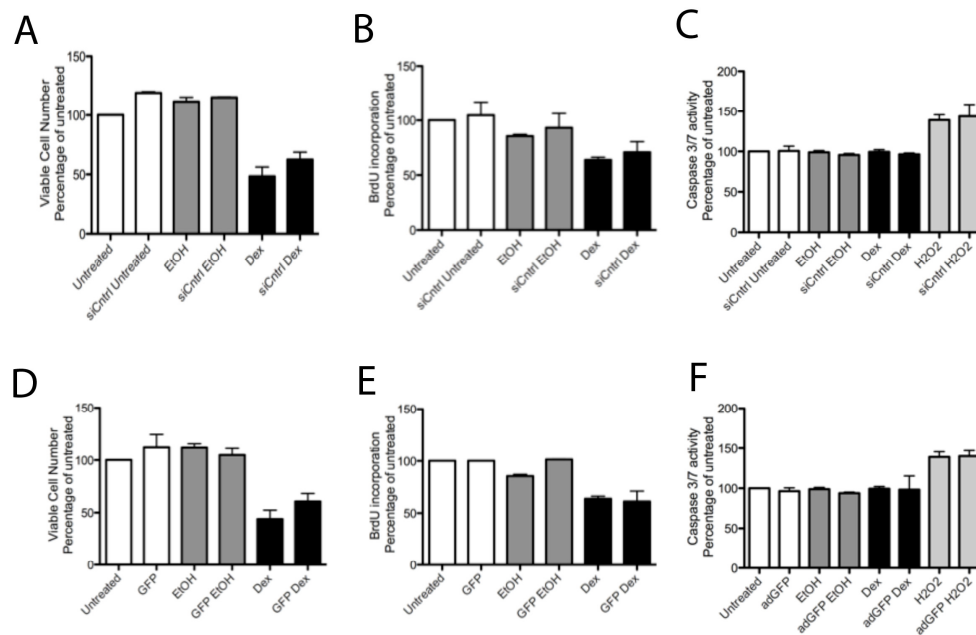

Supplementary Figure 2

**Senescence-associated  $\beta$ -galactosidase activity (SA- $\beta$ gal) in glucocorticoid-treated tenocytes.**

Photomicrographs showing increased SA- $\beta$ gal activity (blue staining) following treatment of primary human tenocytes with dexamethasone (1 $\mu$ M) for 72h. (Left ethanol; Right dexamethasone).

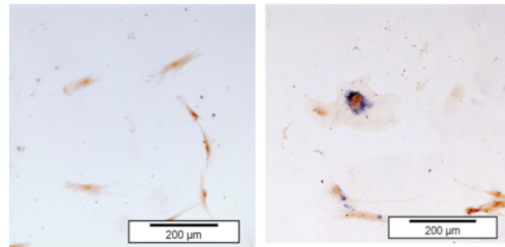

Supplementary Figure 3

**Western blots showing levels of phosphorylated p53 in dexamethasone-treated**

**tenocytes.** There was no difference in the levels of p53 phosphorylated on serines 37, 6, 30 or 392 or on threonine 81 in protein lysates from tenocytes treated with 1 $\mu$ M dexamethasone for 48h compared to tenocytes treated with the corresponding amount of ethanol carrier. p53 phosphorylated on serine 15 was not detectable in lysates from either ethanol-treated or dexamethasone-treated tenocytes (not shown).

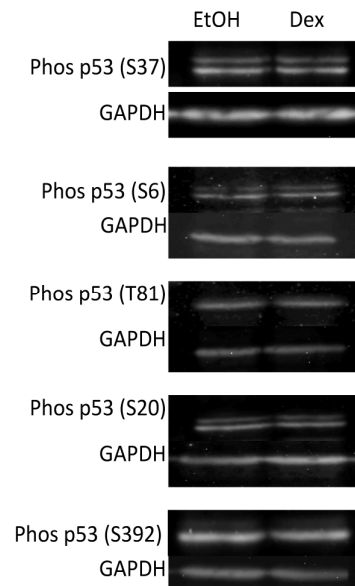

Supplementary Figure 4

**Mean Bonar scores pre- and post- glucocorticoid injection.** There was no significant difference in mean Bonar score, as assessed by H&E and Alcian Blue histological staining of tissue sections, between pre- and post-injection samples.

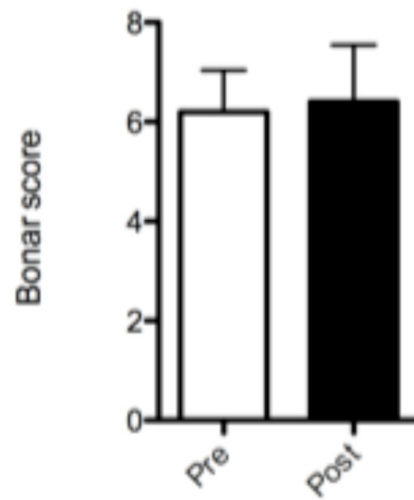

Supplementary Figure 5

**Glucocorticoids induce senescent-like changes in primary human chondrocytes and osteoblasts.** The percentage of SA- $\beta$ gal positive cells was significantly higher ( $p<0.05$ ) following 72h of treatment with dexamethasone ( $1\mu\text{M}$ ) in **A** primary human chondrocytes and **B** primary human osteoblasts compared to ethanol carrier-treated controls ( $n=3$ ).

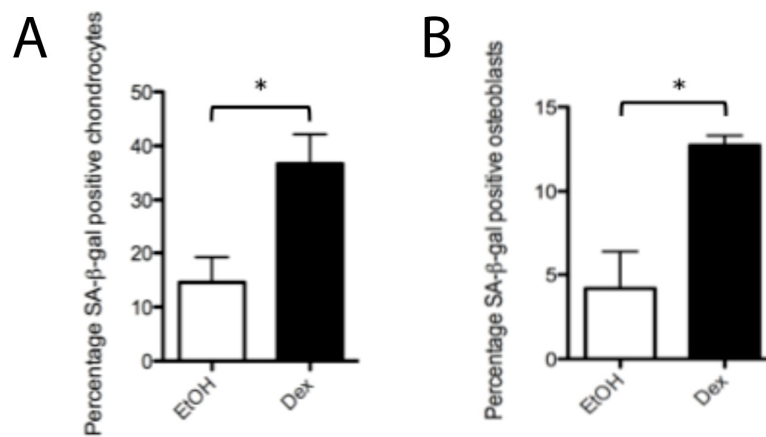

Supplement: annrheumdis-2012-203146-s2.pdf [file annrheumdis-2012-203146-s2.pdf]
